# Supplementary material for: Omics Multi-Layers Networks Provide Novel Mechanistic and Functional Insights Into Fat Storage and Lipid Metabolism in Poultry
Source: Front Genet. 2021 Jul 7;12:646297. doi: 10.3389/fgene.2021.646297 (PMC8292821; doi:10.3389/fgene.2021.646297)
Supplement: Supplementary file 2 [file Table_2.XLSX]

## Sheet: Sheet1
ID	adj.P.Val	P.Value	t	B	logFC	Gene.symbol	Gene.title
1.15.7	0.000119207	3.3179e-06	-5.859	4.46523	-0.840834	3.1	P311 POU
42.5.16	2.76506e-05	4.08998e-07	-6.67076	6.50993	-0.481933	AACS	acetoacetyl-CoA synthetase
23.9.12	7.98057e-06	7.02456e-08	7.37657	8.22856	0.902051	AARS	alanyl-tRNA synthetase
14.9.12	5.28572e-05	1.03787e-06	6.30656	5.60042	0.459506	ABCA1	ATP-binding cassette, sub-family A (ABC1), member 1
19.13.16	0.000102832	2.67255e-06	5.94179	4.67648	0.971954	ABCC2	ATP-binding cassette, sub-family C (CFTR/MRP), member 2
42.7.2	0.000373089	1.72942e-05	-5.23291	2.85419	-0.362712	ABCF3	ATP-binding cassette, sub-family F (GCN20), member 3
47.9.7	3.54016e-08	1.84383e-12	-12.3131	18.3328	−3.18	ACAT1
46.12.19	0.000418262	1.99561e-05	-5.17899	2.71468	-0.724103	ACO1	aconitase 1, soluble
28.13.1	1.5996e-05	1.79955e-07	6.99673	7.3113	0.747126	ACOX1	acyl-Coenzyme A oxidase 1, palmitoyl
24.14.7	0.000161461	4.88588e-06	5.71138	4.08731	0.988195	ACOX2	acyl-Coenzyme A oxidase 2, branched chain
37.13.7	7.4886e-06	6.393e-08	-7.41501	8.32035	-0.831524	ACOX3	acyl-Coenzyme A oxidase 3, pristanoyl
45.4.10	4.06623e-05	7.07308e-07	6.45587	5.97499	0.489308	ACSBG1	acyl-CoA synthetase bubblegum family member 1
14.17.7	0.000517751	2.68583e-05	5.06722	2.42538	1.29969	ACSL3	acyl-CoA synthetase long-chain family member 3
10.9.8	0.000264595	1.01842e-05	-5.43277	3.37051	-0.271274	ACSS2	acyl-CoA synthetase short-chain family member 2
45.19.3	3.97732e-08	4.45837e-12	-11.8399	17.5062	-1.5	ADH1C
2.17.13	0.000342466	1.52578e-05	5.28014	2.9763	0.727089	ADIPOQ	adiponectin, C1Q and collagen domain containing
47.6.5	4.91527e-05	9.26733e-07	-6.35057	5.71106	-0.776643	ADIPOR1	adiponectin receptor 1
41.15.1	1.10031e-05	1.11177e-07	-7.19029	7.78103	-0.682425	ADK	adenosine kinase
45.10.19	0.000261412	1.00208e-05	-5.43889	3.38628	-0.884603	ADRBK2	adrenergic, beta, receptor kinase 2
8.1.17	0.000470028	2.34524e-05	5.11823	2.55743	0.602867	AGR2	anterior gradient homolog 2 (Xenopus laevis)
29.16.12	4.22368e-05	7.55093e-07	-6.43035	5.91113	-0.471283	AIFM2	apoptosis-inducing factor, mitochondrion-associated, 2
48.15.13	0.00026496	1.0212e-05	5.43174	3.36784	0.351896	AKR1A1	aldo-keto reductase family 1, member A1 (aldehyde reductase)
5.17.10	0.00045845	2.27315e-05	5.12997	2.58784	0.663006	AKR1B10	aldo-keto reductase family 1, member B10 (aldose reductase)
29.19.3	2.6159e-06	1.2807e-08	-8.08343	9.88432	-0.681693	AKT2	v-akt murine thymoma viral oncogene homolog 2
46.8.15	0.000320879	1.37711e-05	-5.31881	3.07624	-0.46793	ALDH3A2	aldehyde dehydrogenase 3 family, member A2
45.17.3	8.80166e-07	2.65884e-09	-8.76193	11.4077	-0.670092	ALG9	asparagine-linked glycosylation 9 homolog (S. cerevisiae, alpha- 1,2-mannosyltransferase)
41.14.1	0.000498919	2.55176e-05	-5.08648	2.47524	-0.434067	AMN	amnionless homolog (mouse)
39.17.3	5.34939e-06	3.87273e-08	-7.62084	8.80847	-0.715972	ANK1	ankyrin 1, erythrocytic
12.8.13	5.2742e-05	1.02944e-06	6.30973	5.6084	1.01597	ANKRD32	ankyrin repeat domain 32
7.10.3	3.87035e-05	6.55855e-07	6.48539	6.04876	0.921605	ANXA7	annexin A7
27.19.8	1.82807e-05	2.21717e-07	6.9134	7.10765	1.00448	AP1G1	adaptor-related protein complex 1, gamma 1 subunit
40.10.5	0.000127534	3.6201e-06	5.82569	4.3801	0.402954	APOA1	apolipoprotein A-I
34.9.7	3.97732e-08	6.28881e-12	-11.6591	17.1829	−1.16	APOA1
16.9.12	4.38396e-06	2.92104e-08	7.73764	9.08291	0.845636	APOD	apolipoprotein D
45.6.18	3.97732e-08	9.03051e-12	-11.4709	16.8421	-1.15	APP
45.7.20	0.000270938	1.05976e-05	5.41773	3.33169	0.638531	ASAH1	N-acylsphingosine amidohydrolase (acid ceramidase) 1
17.2.9	0.000186009	5.98716e-06	5.63409	3.88888	0.694681	ASCC1	activating signal cointegrator 1 complex subunit 1
45.1.14	4.33615e-05	7.92702e-07	6.4114	5.86366	0.605149	ATN1	atrophin 1
24.2.17	0.000209493	7.11404e-06	5.56863	3.72056	0.808119	ATP6V1B2	ATPase, H+ transporting, lysosomal 56/58kDa, V1 subunit B2
46.1.19	8.40757e-06	7.53179e-08	-7.34817	8.16062	-0.596316	B2M	beta-2-microglobulin
8.7.1	7.96481e-05	1.89579e-06	6.07368	5.0119	0.445139	B3GALT1	UDP-Gal:betaGlcNAc beta 1,3-galactosyltransferase, polypeptide 1
45.9.19	3.97732e-08	1.03576e-11	-11.4001	16.7128	−1.15	BCO2
47.9.1	7.65451e-05	1.78681e-06	-6.09648	5.06974	-0.546117	BCS1L	BCS1-like (yeast)
41.4.15	0.000115169	3.16218e-06	-5.87738	4.51217	-0.598395	BF1	MHC class I antigen B-F minor heavy chain
24.5.3	0.000484546	2.44797e-05	5.1021	2.51568	0.694412	B-G	MHC B-G antigen
15.5.12	3.75555e-05	6.18226e-07	6.5085	6.10646	1.31581	BRD1	bromodomain containing 1
48.16.3	1.07348e-05	1.06789e-07	-7.20656	7.8203	-1.0815	BTG2	BTG family, member 2
19.19.14	1.70048e-06	6.99678e-09	8.34124	10.4709	0.91349	BYSL	bystin-like
28.9.12	5.62759e-06	4.22069e-08	7.58535	8.72472	0.621807	C12orf5	chromosome 12 open reading frame 5
27.14.9	0.000146719	4.32018e-06	5.75825	4.20746	0.481839	C1QB	complement component 1, q subcomponent, B chain
48.4.19	0.000274797	1.08058e-05	-5.41038	3.31271	-0.484222	C1QBP	complement component 1, q subcomponent binding protein
40.9.9	0.000321909	1.38826e-05	-5.31576	3.06838	-0.653529	C20orf3	chromosome 20 open reading frame 3
10.2.16	0.000166621	5.12879e-06	5.69291	4.03994	0.771715	CA5B	carbonic anhydrase VB, mitochondrial
41.5.20	0.000239423	8.85335e-06	5.48576	3.50712	0.507572	CACNA1H	calcium channel, voltage-dependent, T type, alpha 1H subunit
6.2.5	0.000491321	2.49499e-05	5.09494	2.49715	0.732059	CAP2	CAP, adenylate cyclase-associated protein, 2 (yeast)
10.1.2	0.000493954	2.51351e-05	5.09216	2.48995	1.17698	CAPRIN1	cell cycle associated protein 1
27.15.2	8.00162e-05	1.90872e-06	6.07106	5.00526	0.617173	CASP6	caspase 6, apoptosis-related cysteine peptidase
7.3.2	0.000432547	2.0839e-05	5.16269	2.67251	0.372727	CCBL1	cysteine conjugate-beta lyase; cytoplasmic (glutamine transaminase K, kyneurenine aminotransferase)
13.15.17	0.000240071	8.90264e-06	5.48365	3.50171	0.610325	CCDC12	coiled-coil domain containing 12
46.6.5	7.32878e-06	6.10732e-08	-7.43369	8.36489	-0.66561	CCDC21	coiled-coil domain containing 21
45.7.18	0.000293382	1.18608e-05	5.37518	3.22186	0.428965	CCDC58	coiled-coil domain containing 58
39.16.19	1.00097e-05	9.56956e-08	-7.25093	7.92723	-0.812552	CCNC	cyclin C
18.18.20	0.000345008	1.54715e-05	-5.27489	2.96274	-0.296038	CCNF	cyclin F
19.6.16	6.33432e-05	1.35594e-06	6.20298	5.33929	0.494919	CD164	CD164 molecule, sialomucin
24.10.2	0.000192007	6.24024e-06	5.61836	3.84847	0.558658	CD34	CD34 molecule
19.8.6	0.000110357	2.95708e-06	5.90304	4.57767	0.398043	CD3E	CD3e molecule, epsilon (CD3-TCR complex)
45.1.12	3.15101e-05	4.89062e-07	-6.60041	6.33535	-0.785301	CD93	CD93 molecule
24.2.8	5.86967e-05	1.21368e-06	6.24588	5.44756	0.41398	CDH22	cadherin-like 22
41.6.9	0.000104327	2.72946e-06	-5.93371	4.6559	-0.657087	CDON	Cdon homolog (mouse)
42.7.16	1.31315e-05	1.4089e-07	7.09486	7.55004	0.56297	CEBPB	CCAAT/enhancer binding protein (C/EBP), beta
11.18.9	0.000307468	1.28272e-05	5.3456	3.14548	0.671829	CFL2	cofilin 2 (muscle)
45.7.8	0.000160164	4.83828e-06	5.7151	4.09687	0.328426	CHCHD2	coiled-coil-helix-coiled-coil-helix domain containing 2
2.11.6	0.000295924	1.20065e-05	-5.37057	3.20995	-0.338901	CHMP4C	chromatin modifying protein 4C
45.3.20	5.50876e-05	1.1161e-06	6.27836	5.52944	0.506808	CIAO1	cytosolic iron-sulfur protein assembly 1 homolog (S. cerevisiae)
19.17.13	2.05014e-06	9.18497e-09	8.22473	10.207	0.824983	CKMT2	creatine kinase, mitochondrial 2 (sarcomeric)
15.13.14	1.06194e-05	1.05023e-07	7.2133	7.83655	0.717682	CLDN2	claudin 2
47.18.5	5.07044e-05	9.63912e-07	-6.33528	5.67264	-0.519614	CNKSR3	CNKSR family member 3
41.1.6	0.000340974	1.5033e-05	-5.28573	2.99076	-0.860809	CNTN1	contactin 1
48.10.3	0.000151136	4.52622e-06	-5.74049	4.16197	-0.662512	COG5	component of oligomeric golgi complex 5
15.16.16	9.87592e-05	2.53999e-06	5.96129	4.72617	0.799965	COG6	component of oligomeric golgi complex 6
46.1.6	1.94368e-05	2.50046e-07	-6.86554	6.9903	-0.523913	COL18A1	collagen, type XVIII, alpha 1
38.7.6	0.000461096	2.28896e-05	-5.12737	2.58109	-0.587404	COLEC12	collectin sub-family member 12
3.13.7	6.61501e-05	1.46082e-06	-6.17419	5.26651	-1.12457	CPOX	coproporphyrinogen oxidase
42.14.12	1.82807e-05	2.21844e-07	-6.91317	7.10709	-0.370997	CREB3L3	cAMP responsive element binding protein 3-like 3
41.8.18	5.32084e-06	3.82436e-08	-7.62603	8.82071	-1.07738	CRY2	cryptochrome 2 (photolyase-like)
41.1.20	0.000104092	2.71072e-06	5.93635	4.66263	0.479467	CRY2	cryptochrome 2 (photolyase-like)
26.18.13	2.72189e-05	3.93283e-07	6.68621	6.54818	1.13749	CRYZL1	crystallin, zeta (quinone reductase)-like 1
34.16.19	6.13265e-05	1.2936e-06	-6.22119	5.38526	-0.583638	CSRP2	cysteine and glycine-rich protein 2
37.4.13	6.02327e-05	1.25485e-06	6.23296	5.41498	0.339743	CTCF	CCCTC-binding factor (zinc finger protein)
41.9.4	2.77876e-05	4.12472e-07	-6.66743	6.50167	-0.664686	CTNNB1	catenin (cadherin-associated protein), beta 1, 88kDa
45.10.3	4.65351e-08	1.61813e-11	-11.1719	16.2914	-1.14	CYP27A1
45.8.19	4.65351e-08	1.69659e-11	-11.1479	16.2466	-1.8	CYP2E1
27.19.14	0.000356811	1.62981e-05	5.25527	2.91201	0.4284	DACT1	dapper, antagonist of beta-catenin, homolog 1 (Xenopus laevis)
12.5.16	0.00047035	2.3532e-05	5.11695	2.55413	0.725845	DCLK1	doublecortin-like kinase 1
23.10.3	0.000111387	3.00513e-06	5.89687	4.56192	0.685716	DCPS	decapping enzyme, scavenger
41.1.9	0.000213605	7.44281e-06	-5.5515	3.67647	-0.622527	DCTN1	dynactin 1 (p150, glued homolog, Drosophila)
1.3.10	0.000454652	2.24721e-05	5.13429	2.59901	0.55247	DCTN4	dynactin 4 (p62)
3.4.15	0.000272129	1.06584e-05	-5.41557	3.32611	-0.295906	DCTN6	dynactin 6
23.15.1	0.000235135	8.58486e-06	5.49741	3.53717	0.499294	DDB1	damage-specific DNA binding protein 1, 127kDa
34.9.19	7.27123e-05	1.65875e-06	-6.12514	5.14238	-0.611981	DDR2	discoidin domain receptor family, member 2
41.16.18	6.50554e-05	1.43325e-06	6.18155	5.28512	0.329105	DDX11	DEAD/H (Asp-Glu-Ala-Asp/His) box polypeptide 11 (CHL1-like helicase homolog, S. cerevisiae)
19.9.12	3.62509e-07	7.55227e-10	9.32509	12.622	1.04531	DEAF1	deformed epidermal autoregulatory factor 1 (Drosophila)
12.14.9	5.44627e-06	4.05634e-08	7.60172	8.76338	0.960524	DECR1	2,4-dienoyl CoA reductase 1, mitochondrial
10.16.7	0.000270869	1.05808e-05	5.41833	3.33324	1.05263	DEPDC6	DEP domain containing 6
2.17.12	4.79139e-05	9.00882e-07	-6.36158	5.7387	-0.704094	DERL2	Der1-like domain family, member 2
19.7.12	5.17371e-08	2.38938e-11	10.975	15.9223	1.11	DHCR7
23.18.14	1.92385e-05	2.40481e-07	6.88105	7.02837	0.589604	DIO1	deiodinase, iodothyronine, type I
24.18.14	7.60614e-05	1.77081e-06	6.09994	5.07852	0.926804	DIO1	deiodinase, iodothyronine, type I
45.2.6	1.02233e-05	9.90379e-08	-7.23703	7.89376	-0.704869	DNALI1	dynein, axonemal, light intermediate chain 1
13.16.8	0.000292994	1.18122e-05	5.37673	3.22586	1.61326	DNMBP	dynamin binding protein
45.16.4	6.95965e-07	1.84063e-09	-8.92457	11.763	-0.891699	DPM1	dolichyl-phosphate mannosyltransferase polypeptide 1, catalytic subunit
44.3.2	0.000136631	3.94949e-06	-5.79245	4.29506	-0.480698	DPM1	dolichyl-phosphate mannosyltransferase polypeptide 1, catalytic subunit
15.13.6	0.000106126	2.80239e-06	5.92361	4.63014	0.801439	DPP9	dipeptidyl-peptidase 9
28.18.6	0.000450091	2.20357e-05	5.14167	2.61812	0.503235	DR1	down-regulator of transcription 1, TBP-binding (negative cofactor 2)
39.13.5	0.000427179	2.04913e-05	-5.16902	2.6889	-0.378274	DUSP16	dual specificity phosphatase 16
45.9.5	8.71833e-07	2.4624e-09	-8.79574	11.4819	-0.77701	DYNC1H1	cytoplasmic dynein
47.7.6	4.38396e-06	2.92264e-08	-7.73741	9.08237	-0.635606	DYRK1A	dual-specificity tyrosine-(Y)-phosphorylation regulated kinase 1A
39.18.18	3.69211e-06	2.18739e-08	-7.85819	9.36419	-0.84532	EDARADD	EDAR-associated death domain
48.1.19	1.27538e-06	4.45838e-09	-8.53592	10.9076	-0.952287	EEA1	early endosome antigen 1
37.8.5	9.94736e-05	2.57492e-06	-5.95605	4.71283	-0.602806	EEF1A1	eukaryotic translation elongation factor 1 alpha 1
41.8.4	5.17371e-08	2.60092e-11	-10.9325	15.8419	-1.21	EHHADH
46.1.11	0.000189869	6.15097e-06	-5.62383	3.86253	-0.594404	EIF1	eukaryotic translation initiation factor 1
48.3.14	0.000333551	1.44712e-05	5.3001	3.02789	0.331943	EIF2S1	eukaryotic translation initiation factor 2, subunit 1 alpha, 35kDa
44.1.4	6.97841e-05	1.56651e-06	-6.14721	5.19827	-0.598134	EIF3EIP	eukaryotic translation initiation factor 3, subunit E interacting protein
45.4.9	0.000501942	2.5803e-05	5.08229	2.46441	0.597758	EIF3EIP	eukaryotic translation initiation factor 3, subunit E interacting protein
11.8.15	0.000170797	5.3374e-06	-5.67775	4.00102	-0.349455	EIF4EBP1	eukaryotic translation initiation factor 4E binding protein 1
2.6.4	0.000307468	1.2798e-05	5.34646	3.1477	1.08414	ELF3	E74-like factor 3 (ets domain transcription factor, epithelial-specific )
47.4.19	5.02223e-05	9.49514e-07	-6.34113	5.68734	-0.874395	ENOPH1	enolase-phosphatase 1
45.1.20	0.000163267	4.98303e-06	5.70388	4.06809	0.462475	EPB41L3	erythrocyte membrane protein band 4.1-like 3
11.8.7	0.000306204	1.26628e-05	-5.35047	3.15805	-0.384021	ESAM	endothelial cell adhesion molecule
37.10.7	5.2742e-05	1.02206e-06	-6.31252	5.61542	-0.762142	ETF1	eukaryotic translation termination factor 1
18.11.9	9.06461e-05	2.25671e-06	6.00667	4.84167	0.963451	F13A1	coagulation factor XIII, A1 polypeptide
29.14.18	0.000110357	2.95473e-06	-5.90334	4.57845	-0.665129	FADS2	fatty acid desaturase 2
46.7.2	0.000192666	6.27167e-06	-5.61645	3.84356	-0.384847	FADS2	fatty acid desaturase 2
46.7.6	5.17371e-08	2.80943e-11	-10.8939	15.7687	1.21	FADS2
43.15.1	0.000111592	3.01926e-06	-5.89507	4.55734	-0.365537	FAM20A	family with sequence similarity 20, member A
48.3.8	5.17371e-08	3.03971e-11	-10.8546	15.694	1.36	FASN
44.3.18	0.000461096	2.29347e-05	-5.12662	2.57917	-0.567859	FBLN1	fibulin 1
41.9.20	9.58709e-05	2.43172e-06	5.978	4.76871	0.51701	FBP1	fructose-1,6-bisphosphatase 1
45.1.2	7.514e-05	1.73754e-06	-6.10725	5.09705	-0.465713	FHL3	four and a half LIM domains 3
15.4.8	0.00040136	1.89392e-05	5.19868	2.76565	1.21513	FKBP5	FK506 binding protein 5
41.5.4	8.6055e-06	7.75392e-08	-7.33634	8.1323	-0.627001	FMO6	flavin containing monooxygenase 6
19.2.14	1.70048e-06	6.83404e-09	8.35136	10.4937	0.713388	FUS/TLS	fusion
45.3.19	5.17371e-08	3.23357e-11	-10.8238	15.6353	1.46	G6PC
13.14.6	0.000263225	1.0104e-05	5.43576	3.37822	0.789741	GALE	UDP-galactose-4-epimerase
19.6.7	0.00042938	2.06192e-05	-5.16668	2.68284	-0.290806	GALM	galactose mutarotase (aldose 1-epimerase)
45.6.1	6.44962e-08	4.36693e-11	-10.6749	15.3498	-1.21	GAMT
33.10.9	9.79361e-05	2.50451e-06	-5.96668	4.73991	-0.576059	GDAP2	ganglioside induced differentiation associated protein 2
30.17.3	3.36501e-06	1.78766e-08	-7.94277	9.56035	-0.79376	GGTLA1	gamma-glutamyltransferase-like activity 1
48.8.5	5.36678e-07	1.31374e-09	-9.07507	12.0885	-0.8964	GLO1	glyoxalase I
48.7.19	8.78509e-07	2.60807e-09	-8.77042	11.4263	-0.984745	GNG12	guanine nucleotide binding protein (G protein), gamma 12
43.15.6	1.07537e-05	1.07537e-07	-7.20373	7.81348	-0.667569	GNMT	glycine N-methyltransferase
45.9.12	2.99749e-05	4.54307e-07	6.62939	6.40733	0.448037	GNPDA1	glucosamine-6-phosphate deaminase 1
38.3.8	7.32878e-06	6.08711e-08	-7.43504	8.36812	-0.878701	GNS	glucosamine (N-acetyl)-6-sulfatase (Sanfilippo disease IIID)
16.9.6	4.22368e-05	7.53958e-07	6.43094	5.9126	0.496315	GOLGA2	golgi autoantigen, golgin subfamily a, 2
15.15.2	0.000111039	2.98418e-06	5.89955	4.56876	0.649379	GOLM1	golgi membrane protein 1
46.4.5	7.514e-05	1.73761e-06	-6.10723	5.09701	-0.432988	GORASP2	golgi reassembly stacking protein 2, 55kDa
23.1.11	9.58619e-05	2.41877e-06	5.98005	4.77393	0.665819	GPM6B	glycoprotein M6B
43.4.3	2.07893e-05	2.75025e-07	-6.82772	6.89736	-0.515468	GPR37L1	G protein-coupled receptor 37 like 1
42.18.15	0.000514772	2.66234e-05	-5.07052	2.43394	-0.321194	GSTT1	glutathione S-transferase theta 1
15.18.6	5.44259e-05	1.09986e-06	6.28405	5.54376	0.699133	GUCY1B3	guanylate cyclase 1, soluble, beta 3
41.5.6	6.92709e-08	5.31143e-11	-10.5786	15.1636	-1.1	HADHB
32.1.19	0.000293382	1.18728e-05	-5.3748	3.22087	-0.416733	HGS	hepatocyte growth factor-regulated tyrosine kinase substrate
41.10.3	9.01517e-05	2.23032e-06	-6.01119	4.85316	-0.579877	HIBADH	3-hydroxyisobutyrate dehydrogenase
34.13.19	0.000355343	1.6194e-05	-5.25768	2.91825	-0.599735	HIPK2	homeodomain interacting protein kinase 2
39.7.19	0.000230113	8.3296e-06	-5.50884	3.56662	-0.557782	HK1	hexokinase 1
45.9.3	6.92709e-08	5.41179e-11	-10.5694	15.1458	1.09	HMGCR
41.2.1	4.22368e-05	7.53507e-07	-6.43117	5.91319	-0.756218	HNRPH1	heterogeneous nuclear ribonucleoprotein H1 (H)
38.8.5	0.000169978	5.30296e-06	-5.68021	4.00734	-0.593097	HPCAL1	hippocalcin-like 1
22.16.8	3.80961e-05	6.40131e-07	6.49488	6.07246	0.670777	HPRT1	hypoxanthine phosphoribosyltransferase 1
22.15.17	2.88394e-05	4.32591e-07	6.64867	6.45516	0.516977	HRAS	v-Ha-ras Harvey rat sarcoma viral oncogene homolog
45.15.1	8.79214e-08	7.61777e-11	-10.4027	14.8201	-1.92	HSD17B4
33.2.5	1.86908e-05	2.31688e-07	-6.89588	7.06472	-0.788288	HSD17B4	hydroxysteroid (17-beta) dehydrogenase 4
48.1.10	8.79214e-08	7.78471e-11	-10.3922	14.7994	-1.19	HSD17B6
45.1.4	0.00011439	3.1338e-06	-5.88083	4.52098	-1.30573	HSP90B1	heat shock protein 90kDa beta (Grp94), member 1
23.3.6	0.000276428	1.09131e-05	-5.40664	3.30307	-0.544838	HSPB8	heat shock 22kDa protein 8
19.16.16	0.00030794	1.28685e-05	5.34439	3.14234	0.600022	HSPG	basement membrane-specific heparan sulfate proteoglycan core protein
16.4.18	0.00047035	2.35791e-05	5.1162	2.55218	0.575556	HYAL1	hyaluronoglucosaminidase 1
29.6.2	0.000379784	1.76837e-05	-5.22452	2.83248	-0.642343	ICER	ICER protein
14.8.9	0.00047035	2.35878e-05	5.11606	2.55182	0.698059	ICT1	immature colon carcinoma transcript 1
44.3.10	3.677e-06	2.10797e-08	-7.87366	9.40015	-0.76467	IDH1	isocitrate dehydrogenase 1 (NADP+), soluble
34.16.3	0.000196966	6.45432e-06	-5.60555	3.81554	-0.745007	IFNAR2	interferon (alpha, beta and omega) receptor 2
47.14.4	4.4805e-05	8.35427e-07	-6.39094	5.81238	-0.713343	IL11RA	interleukin 11 receptor, alpha
15.15.8	2.08125e-06	9.53906e-09	8.20859	10.1703	0.898687	IL15	interleukin 15
15.3.18	0.000285534	1.13886e-05	5.39053	3.26148	0.631042	IMP3	IMP3, U3 small nucleolar ribonucleoprotein, homolog (yeast)
45.12.18	1.10536e-07	1.03628e-10	-10.254	14.5265	1.74	INSIG2
19.5.11	8.35325e-06	7.43962e-08	7.35318	8.17262	0.751669	INSR	insulin receptor
1.4.4	9.49709e-05	2.38064e-06	-5.98615	4.78945	-0.807572	IQCK	IQ motif containing K
6.19.11	0.000454358	2.23866e-05	-5.13573	2.60273	-0.442858	IRF4	interferon regulatory factor 4
41.6.18	1.11575e-07	1.12673e-10	-10.2138	14.4465	-1.59	IRS1
39.18.2	0.000380041	1.77353e-05	5.22342	2.82965	0.346576	ITCH	itchy homolog E3 ubiquitin protein ligase (mouse)
33.17.3	0.000270863	1.05665e-05	-5.41884	3.33456	-0.504125	ITFG2	integrin alpha FG-GAP repeat containing 2
6.11.3	3.70515e-05	6.05947e-07	6.51635	6.12606	1.08952	ITFG3	integrin alpha FG-GAP repeat containing 3
20.5.5	7.47277e-06	6.30515e-08	7.42066	8.33383	0.468626	ITGB5	integrin, beta 5
33.5.18	0.000209631	7.13617e-06	-5.56745	3.71753	-0.686126	ITGB6	integrin, beta 6
11.11.6	0.0003142	1.32507e-05	-5.33334	3.1138	-0.341859	ITIH5	inter-alpha (globulin) inhibitor H5
42.9.5	0.000387177	1.81208e-05	-5.21532	2.80869	-0.596121	JAG1	jagged 1
16.5.12	0.000433939	2.10511e-05	5.15888	2.66265	0.86943	KCNK15	potassium channel, subfamily K, member 15
28.3.4	0.000239423	8.86612e-06	5.48521	3.50572	0.43055	KPNA3	karyopherin alpha 3 (importin alpha 4)
48.11.10	3.80961e-05	6.42872e-07	-6.49321	6.06828	-0.790227	KTELC1	KTEL (Lys-Tyr-Glu-Leu) containing 1
45.15.18	1.11575e-07	1.16224e-10	-10.1989	14.4169	1.32	LCAT
26.15.2	0.000211336	7.28584e-06	5.55958	3.69727	0.540647	LDHD	lactate dehydrogenase D
13.19.1	8.41392e-05	2.04213e-06	6.04507	4.93927	1.0188	LETM2	leucine zipper-EF-hand containing transmembrane protein 2
47.6.18	0.000188232	6.08813e-06	-5.62773	3.87255	-0.852281	LIMD1	LIM domains containing 1
14.16.15	0.000205491	6.94603e-06	-5.57769	3.74388	-0.300329	LMO7	LIM domain 7
45.8.20	0.000391904	1.83705e-05	5.21017	2.79535	0.301873	LOC395566	T-protein
24.10.10	8.14969e-05	1.95677e-06	6.06149	4.98098	0.636259	LOC395818	JTAP-1
37.13.18	0.000139166	4.03728e-06	-5.78407	4.27359	-0.764123	LOC396026	occludin
45.8.6	6.44703e-05	1.39437e-06	6.19217	5.31198	0.408276	LOC396235	c-ets-1 oncogene
39.16.5	0.000112774	3.06603e-06	5.88919	4.54233	0.370227	LOC396468	Na,K-ATPase alpha-2-subunit
42.6.16	7.33298e-05	1.67666e-06	6.121	5.13189	0.643318	LOC396468	Na,K-ATPase alpha-2-subunit
6.12.10	3.44042e-05	5.48318e-07	6.55552	6.22366	0.689805	LOC408047	thymosin beta 4
41.3.4	8.71833e-07	2.42885e-09	-8.80179	11.4951	-1.12618	LOC415303	similar to stomatin related protein
35.17.4	0.000267468	1.04062e-05	-5.42462	3.34947	-0.488746	LOC415553	similar to Hypothetical protein FLJ11506
42.8.5	0.000225521	8.00959e-06	-5.52368	3.60485	-0.477453	LOC415665	similar to mKIAA1930 protein
26.7.19	0.000353351	1.6048e-05	-5.2611	2.92708	-0.629532	LOC415757	similar to RIKEN cDNA 1600014C10
48.6.1	0.000172689	5.45049e-06	-5.66978	3.98055	-0.545247	LOC415822	similar to conserved hypothetical protein
37.11.16	3.5323e-06	1.89493e-08	-7.91831	9.50371	-0.543412	LOC416190	hypothetical gene supported by CR353602; CR391046
42.10.3	1.06194e-05	1.05088e-07	-7.21305	7.83595	-0.612409	LOC416235	ovoinhibitor
41.8.5	2.64926e-06	1.31083e-08	-8.07358	9.86173	-0.931674	LOC416658	hypothetical LOC416658
45.17.4	2.44839e-06	1.18594e-08	-8.116	9.95895	-0.701569	LOC416662	similar to transmembrane protein I1
43.18.18	0.000163267	4.96854e-06	-5.70499	4.07093	-0.453769	LOC416681	similar to hypothetical protein FLJ14803
7.4.5	0.000285128	1.13457e-05	5.39195	3.26516	0.61459	LOC416685	similar to coatomer protein gamma2-COP
41.2.4	0.000225609	8.06597e-06	5.52103	3.598	0.611343	LOC416891	similar to ISCU2
44.12.19	4.33615e-05	7.91451e-07	-6.41201	5.8652	-0.856933	LOC417026	similar to hypothetical protein FLJ21415
19.1.5	0.000182294	5.81063e-06	5.64546	3.91809	0.710552	LOC417113	similar to nitric oxide synthase 1 (neuronal) adaptor protein
48.11.18	2.11954e-07	3.53256e-10	-9.67439	13.3524	-1.12504	LOC417248	similar to RIKEN cDNA 6330416G13 gene
24.13.11	0.000319833	1.36762e-05	5.32141	3.08298	0.605332	LOC417281	similar to ecto-ATP-diphosphohydrolase
31.3.9	0.00021152	7.32609e-06	5.55749	3.69189	0.813643	LOC417954	similar to Histone H1.2 (H1d)
35.13.7	4.38396e-06	2.9071e-08	-7.73963	9.08756	-0.683458	LOC418110	similar to KIAA1718 protein
30.11.7	1.07301e-06	3.53138e-09	-8.63747	11.1332	-0.911208	LOC418453	hypothetical gene supported by CR390280
28.4.13	0.000182877	5.83874e-06	5.64362	3.91338	0.467731	LOC418856	similar to esterase D
16.6.3	0.00047035	2.35582e-05	5.11653	2.55304	0.600729	LOC418939	similar to family with sequence similarity 123A
42.5.18	2.08805e-05	2.78406e-07	-6.82287	6.88543	-0.991381	LOC418957	similar to M-phase phosphoprotein, mpp8
27.18.7	0.000250409	9.48165e-06	5.45981	3.44023	0.431903	LOC419294	similar to RP5-1054A22.3
22.2.18	0.000355633	1.62257e-05	-5.25695	2.91634	-0.779414	LOC420006	similar to DLGH2 protein
41.7.11	0.000480528	2.42517e-05	-5.10562	2.52479	-0.470513	LOC420073	similar to R31449_3
4.19.9	0.000202031	6.76594e-06	5.58766	3.76952	0.672592	LOC420074	similar to C19orf28 protein
48.6.9	4.59782e-05	8.62091e-07	-6.37871	5.78169	-0.639248	LOC420348	similar to hypothetical protein FLJ14825
22.17.5	0.0001711	5.3558e-06	5.67644	3.99766	0.756158	LOC420924	hypothetical LOC420924
10.15.7	1.82807e-05	2.20881e-07	-6.91491	7.11134	-0.817718	LOC420998	hypothetical LOC420998
29.4.4	0.000153147	4.60239e-06	5.73414	4.14567	0.518799	LOC421253	hypothetical LOC421253
48.13.9	5.14689e-07	1.2063e-09	-9.11336	12.1708	-1.21402	LOC421311	similar to RP5-1022P6.2
47.3.4	0.000201725	6.70551e-06	-5.59106	3.77828	-0.858386	LOC421446	similar to chromosome 6 open reading frame 206; mitochondrial ribosomal protein S18A-like 1
30.13.10	4.24955e-05	7.68018e-07	6.42373	5.89455	0.734663	LOC421740	similar to ST3A1
14.15.7	0.000247974	9.32545e-06	5.46609	3.45644	1.18671	LOC421947	similar to neuroblastoma-amplified protein
28.11.11	1.70048e-06	6.93948e-09	8.34478	10.4789	0.779291	LOC422070	hypothetical LOC422070
38.7.19	5.07008e-06	3.5649e-08	-7.65506	8.88908	-0.645489	LOC422090	LOC422090
48.9.9	0.000454652	2.24616e-05	-5.13447	2.59947	-0.508134	LOC422151	similar to FNDC3 protein
7.15.20	0.000236865	8.66037e-06	-5.4941	3.52863	-0.285813	LOC422181	similar to Phosphorylase b kinase regulatory subunit alpha, skeletal muscle isoform (Phosphorylase kinase alpha M subunit)
14.5.12	4.03867e-06	2.56624e-08	7.79152	9.20887	0.951385	LOC422195	similar to CXorf34 protein
46.5.4	2.90975e-05	4.37978e-07	-6.6438	6.44308	-0.468605	LOC422242	hypothetical LOC422242
40.14.3	3.0174e-05	4.61743e-07	-6.62301	6.39148	-0.761774	LOC422470	hypothetical LOC422470
45.6.6	1.00097e-05	9.6159e-08	7.24898	7.92252	0.427707	LOC422470	hypothetical LOC422470
19.5.7	6.70704e-05	1.49511e-06	6.16522	5.24384	-1.6	THBS1
32.9.9	7.36283e-05	1.69115e-06	-6.11768	5.12348	-4.24519	COLEC12
3.12.10	0.000209631	7.14574e-06	5.56694	3.71622	2.1671	TMEM258
33.8.6	0.000149002	4.43903e-06	-5.7479	4.18096	2.2721	HTR7L
47.8.19	4.01731e-05	6.9466e-07	-6.46292	5.99261	-5.41849	ANXA7
45.5.17	2.44839e-06	1.17794e-08	-8.11887	9.96553	-4.6689	RGS19
47.10.3	3.56551e-06	1.93132e-08	-7.91033	9.48522	-0.735967	LOC423536	similar to potassium channel, subfamily K, member 16; pancreatic 2P domain potassium channel TALK-1
11.13.3	0.000168182	5.22942e-06	5.68552	4.02097	1.21969	LOC423629	hypothetical gene supported by CR353074; CR353078
46.6.4	5.03304e-06	3.48643e-08	-7.66427	8.91074	-0.765276	LOC423712	similar to a disintegrin-like and metalloprotease with thrombospondin type 1 motif 14
47.19.5	0.000340974	1.50584e-05	-5.2851	2.98912	-0.556049	LOC423722	hypothetical LOC423722
44.16.13	0.000238513	8.75788e-06	-5.48986	3.5177	-0.846187	LOC423782	hypothetical LOC423782
19.13.15	6.29642e-05	1.33611e-06	6.20868	5.35368	1.09442	LOC423858	similar to C10ORF6
3.17.7	5.73856e-05	1.1776e-06	-6.25757	5.47704	-1.11118	LOC423976	similar to pyrroline-5-carboxylate synthase
47.16.18	0.000117097	3.24203e-06	-5.86784	4.48782	-0.737875	LOC424109	similar to alpha-aspartyl dipeptidase
19.15.14	1.60294e-05	1.83321e-07	6.98931	7.29321	0.649073	LOC424150	similar to mitochondrial methionine aminopeptidase 3
26.9.9	3.39696e-05	5.37852e-07	6.56307	6.24248	0.588282	LOC424368	similar to UDP-N-acteylglucosamine pyrophosphorylase 1
24.13.8	0.000359459	1.64565e-05	5.25162	2.90258	0.349258	LOC424434	hypothetical LOC424434
14.11.12	0.000204498	6.86986e-06	5.58188	3.75464	0.704606	LOC424434	hypothetical LOC424434
10.7.11	0.000304936	1.25786e-05	-5.35299	3.16456	-0.299835	LOC424588	hypothetical LOC424588
33.19.5	0.000111713	3.03138e-06	-5.89354	4.55343	-0.503645	LOC424647	similar to podocan
19.18.11	0.000167782	5.20823e-06	5.68707	4.02494	0.62731	LOC424657	similar to hypothetical protein FLJ32112
40.12.19	5.90683e-05	1.22444e-06	-6.24246	5.43894	-0.702142	LOC424916	similar to organic solute transporter alpha
11.13.2	0.00052083	2.70751e-05	5.0642	2.41756	1.09361	LOC425607	similar to hypothetical protein FLJ22329
16.13.2	6.46466e-05	1.40741e-06	6.18858	5.30289	0.851041	LOC426097	hypothetical gene supported by CR353580; CR391109
38.10.5	8.24851e-05	1.98909e-06	-6.05519	4.96497	-0.568924	LOC426427	similar to KIAA0556 protein
47.18.16	0.000251553	9.56425e-06	-5.45653	3.43177	-0.795836	LOC426615	hypothetical LOC426615
45.3.10	4.18425e-05	7.38781e-07	-6.43888	5.93246	-1.09361	LOC426928	hypothetical LOC426928
19.9.1	3.68551e-06	2.14988e-08	7.86542	9.38101	0.927819	LOC427165	similar to hypothetical protein FLJ13611
28.2.7	0.00025865	9.88796e-06	5.44394	3.3993	0.44203	LOC427408	hypothetical LOC427408
42.3.3	0.000238787	8.78038e-06	-5.48889	3.5152	-0.417962	LOC427847	similar to KIAA1218 protein
16.9.1	0.000270165	1.05252e-05	5.42032	3.33838	0.650186	LOC428066	hypothetical LOC428066
41.9.6	8.51808e-05	2.07185e-06	-6.03951	4.92516	-0.585795	LOC428525	similar to histamine H3 receptor H3S
22.19.7	4.41286e-06	2.96489e-08	-7.73145	9.06841	-0.925552	LOC428658	hypothetical LOC428658
31.19.2	0.000342466	1.52995e-05	-5.27911	2.97364	-0.445033	LOC428807	hypothetical LOC428807
28.17.8	5.43785e-05	1.09323e-06	6.28639	5.54966	0.675331	LOC428996	similar to FLI-LRR associated protein-1
3.11.10	0.000281699	1.11799e-05	5.39751	3.27952	1.05572	LOC430574	similar to myr 6 myosin heavy chain
19.14.7	0.000194896	6.36456e-06	5.61087	3.82921	0.521452	LOC430880	similar to RIKEN cDNA 2810451A06 gene
23.11.16	0.000344868	1.54472e-05	5.27548	2.96427	0.528843	LOC693265	CMD-4
21.12.7	0.000144267	4.20026e-06	5.76898	4.23495	0.57966	LOC768390	similar to PA2.26 antigen
24.5.7	0.00047035	2.35953e-05	5.11594	2.55151	0.687114	LOC768783	hypothetical protein LOC768783
19.18.1	0.000172689	5.4457e-06	5.67011	3.98141	0.681919	LOC769155	hypothetical protein LOC769155
15.15.9	5.92395e-06	4.50421e-08	7.55858	8.66142	1.3393	LOC769451	similar to telomere end-binding protein PTOP
28.13.13	0.000292994	1.18266e-05	5.37627	3.22468	0.535718	LOC769636	hypothetical protein LOC769636
12.11.4	0.000451965	2.21745e-05	5.13931	2.612	0.359153	LOC769802	hypothetical protein LOC769802
20.16.2	2.10737e-05	2.84275e-07	6.81459	6.86507	0.608146	LOC769904	hypothetical protein
2.16.13	0.000350212	1.58508e-05	5.26576	2.93913	0.975922	LOC769951	hypothetical protein LOC769951
47.13.19	2.72659e-06	1.3775e-08	-8.0526	9.81356	-0.939842	LOC770188	similar to histone H2B
28.5.11	0.000234043	8.53282e-06	5.49972	3.5431	0.430656	LOC770232	similar to class I alpha chain
13.13.17	0.000184655	5.90511e-06	5.63933	3.90235	1.10512	LOC770495	similar to energy metabolism-related sodium-dependent high-affinity dicarboxylate transporter
5.12.10	0.000499377	2.55671e-05	5.08575	2.47336	0.607667	LOC770608	similar to KIAA1228 protein
15.9.12	2.53453e-05	3.59059e-07	6.72214	6.63707	1.54917	LOC770713	similar to LIM homeobox transcription factor 1 alpha
1.4.1	0.000369014	1.699e-05	-5.28322	2.90007	-0.650342	LOC771171	hypothetical protein LOC771171
19.14.11	0.00050361	2.59149e-05	5.08067	2.4602	0.576819	LOC771207	similar to Pyridoxal (pyridoxine, vitamin B6) phosphatase
42.4.6	3.73648e-06	2.29638e-08	-7.83787	9.31692	-0.542534	LOC771389	similar to hypothetical protein
28.12.14	0.000166667	5.13889e-06	5.69216	4.03802	0.554467	LOC771495	similar to LOC495245 protein
13.11.9	0.00047035	2.36155e-05	5.11562	2.55068	0.600052	LOC771549	hypothetical protein LOC771549
38.13.19	0.000106104	2.79496e-06	-5.92463	4.63274	-0.756271	LOC771877	similar to complement regulatory soluble protein
19.14.5	8.01813e-05	1.91683e-06	6.06943	5.00112	0.430649	LOC771921	similar to Rhodopsin
44.2.1	0.000353753	1.61031e-05	-5.25981	2.92373	-0.520848	LOC772074	hypothetical protein LOC772074
42.12.4	2.30138e-06	1.09076e-08	-8.15153	10.0402	-0.502248	LOC772194	similar to MGC69456 protein
43.3.4	5.41106e-05	1.07774e-06	6.29193	5.5636	0.360036	LOC772245	hypothetical protein LOC772245
45.18.2	0.000353351	1.60358e-05	-5.26138	2.92782	-0.427992	LOC776599	hypothetical protein LOC776599
28.15.8	6.50554e-05	1.43249e-06	6.18175	5.28564	0.529613	LOC776812	hypothetical protein LOC776812
20.11.15	0.000325912	1.41103e-05	5.30963	3.05252	1.30143	LOH11CR2A	loss of heterozygosity, 11, chromosomal region 2, gene A
12.9.12	8.64501e-05	2.11623e-06	6.03137	4.90446	1.06486	LRP1	low density lipoprotein-related protein 1
15.13.3	0.000225469	7.9736e-06	5.52539	3.60924	0.888603	LSG1	large subunit GTPase 1 homolog (S. cerevisiae)
19.9.17	3.75747e-06	2.32885e-08	7.832	9.30326	0.555797	LYVE1	lymphatic vessel endothelial hyaluronan receptor 1
46.5.12	0.000275951	1.08706e-05	-5.40812	3.30688	-0.445774	MAD2L2	MAD2 mitotic arrest deficient-like 2 (yeast)
33.19.3	0.000353753	1.60945e-05	-5.26001	2.92426	-0.395897	MADD	MAP-kinase activating death domain
48.7.6	7.14341e-05	1.61471e-06	-6.13552	5.16867	-0.485354	MAP2K1IP1	mitogen-activated protein kinase kinase 1 interacting protein 1
41.19.4	2.32107e-05	3.20356e-07	-6.76724	6.74842	-0.663492	MAP2K2	mitogen-activated protein kinase kinase 2
44.10.4	1.86908e-05	2.31348e-07	-6.89647	7.06616	-0.579351	MAPK1	mitogen-activated protein kinase 1
44.10.5	1.60294e-05	1.81419e-07	-6.99349	7.30339	-0.696351	MAPKAP1	mitogen-activated protein kinase associated protein 1
27.7.12	4.4805e-05	8.33077e-07	6.39204	5.81513	0.768863	MARS2	methionyl-tRNA synthetase 2, mitochondrial
43.19.4	0.000430739	2.07069e-05	-5.16508	2.67871	-0.595824	MATN3	matrilin 3
28.2.1	2.02983e-05	2.643e-07	6.84351	6.93619	0.649189	MCCC2	methylcrotonoyl-Coenzyme A carboxylase 2 (beta)
28.8.1	0.000153033	4.591e-06	5.73508	4.14809	0.577843	MCM2	minichromosome maintenance complex component 2
2.17.2	0.000124854	3.52796e-06	5.89259	4.43299	0.900876	METTL9	methyltransferase like 9
23.1.9	7.38107e-05	1.69918e-06	6.11585	5.11886	0.506671	MLLT6	myeloid/lymphoid or mixed-lineage leukemia (trithorax homolog, Drosophila); translocated to, 6
40.8.4	0.000409435	1.93842e-05	5.18994	2.74302	0.303821	MOSPD1	motile sperm domain containing 1
10.13.15	0.000431898	2.07851e-05	-5.16366	2.67503	-0.284745	MPST	mercaptopyruvate sulfurtransferase
48.10.5	1.23014e-05	1.2716e-07	-7.13612	7.65004	-0.773684	MRPL45	mitochondrial ribosomal protein L45
16.10.2	0.000239423	8.84289e-06	5.4862	3.50828	0.368266	MRPL51	mitochondrial ribosomal protein L51
6.13.2	8.11834e-06	7.18811e-08	7.36719	8.20613	1.04738	MSMB	microseminoprotein, beta-
44.9.9	9.03003e-05	2.2387e-06	-6.00975	4.8495	-0.842912	MTMR1	myotubularin related protein 1
10.9.2	0.000148547	4.41773e-06	5.74974	4.18566	0.732014	MUTED	muted homolog (mouse)
45.19.18	1.21504e-07	1.32896e-10	-10.1348	14.2888	1.2	MVD
31.9.7	7.70261e-06	6.67367e-08	-7.39747	8.27849	-0.605883	NADSYN1	NAD synthetase 1
37.9.19	0.000299246	1.22216e-05	5.36386	3.19263	0.290572	NARS2	asparaginyl-tRNA synthetase 2, mitochondrial (putative)
11.2.15	0.000343542	1.53699e-05	-5.27738	2.96916	-0.422123	NDRG3	NDRG family member 3
38.5.18	7.18587e-06	5.87595e-08	-7.44949	8.40251	-0.939936	NDUFA4	NADH dehydrogenase (ubiquinone) 1 alpha subcomplex, 4, 9kDa
39.12.15	3.80961e-05	6.42456e-07	-6.49346	6.06892	-0.398311	NDUFS1	NADH dehydrogenase (ubiquinone) Fe-S protein 1, 75kDa (NADH-coenzyme Q reductase)
40.3.10	5.2742e-05	1.02877e-06	-6.30998	5.60903	-0.932879	NEK9	NIMA (never in mitosis gene a)- related kinase 9
28.15.3	0.000164344	5.03305e-06	5.70008	4.05834	0.529466	NFRKB	nuclear factor related to kappaB binding protein
6.4.8	1.43382e-06	5.22901e-09	8.4668	10.7531	1.44836	NFYC	nuclear transcription factor Y, gamma
32.15.4	5.19918e-05	9.94105e-07	6.32329	5.64251	0.475018	NIPSNAP1	nipsnap homolog 1 (C. elegans)
18.5.14	0.000174489	5.52787e-06	5.66442	3.96679	0.982509	NR0B1	nuclear receptor subfamily 0, group B, member 1
36.12.18	6.44703e-05	1.40022e-06	-6.19056	5.3079	-0.746651	NR1H4	nuclear receptor subfamily 1, group H, member 4
36.5.6	0.0003142	1.32668e-05	-5.33288	3.11262	-0.375909	NRAS	neuroblastoma RAS viral (v-ras) oncogene homolog
31.14.14	0.000320883	1.3788e-05	5.31834	3.07505	0.499196	NRBF2	nuclear receptor binding factor 2
15.17.16	2.00219e-05	2.58616e-07	6.85215	6.95741	0.663534	NRBP2	nuclear receptor binding protein 2
40.15.18	0.000404467	1.91069e-05	-5.19536	2.75706	-0.817195	NT5C1A	5'-nucleotidase, cytosolic IA
20.3.10	0.000461096	2.29107e-05	5.12702	2.58019	0.731969	NUP37	nucleoporin 37kDa
45.7.13	0.000128545	3.65549e-06	5.82198	4.3706	0.442175	OPHN1	oligophrenin 1
46.10.3	6.40458e-05	1.37432e-06	-6.19778	5.32614	-0.681417	OSBPL11	oxysterol binding protein-like 11
14.19.13	2.71787e-06	1.35893e-08	8.05834	9.82673	0.768241	OXCT1	3-oxoacid CoA transferase 1
5.16.10	0.000346184	1.5544e-05	5.27313	2.95818	1.0202	OXSM	3-oxoacyl-ACP synthase, mitochondrial
27.5.2	0.000287673	1.15369e-05	5.38564	3.24886	0.498723	PACSIN1	protein kinase C and casein kinase substrate in neurons 1
45.2.20	3.42146e-05	5.43513e-07	6.55897	6.23226	0.518405	PAFAH1B1	platelet-activating factor acetylhydrolase, isoform Ib, alpha subunit 45kDa
46.7.19	0.000455468	2.25362e-05	-5.13322	2.59624	-0.31718	PANK3	pantothenate kinase 3
1.10.13	0.000227348	8.18217e-06	5.51561	3.58405	1.22467	PANK3	pantothenate kinase 3
10.5.6	0.000107359	2.85814e-06	-5.91607	4.6109	-0.30232	PAQR7	progestin and adipoQ receptor family member VII
45.17.7	0.000507805	2.62101e-05	5.07641	2.44917	0.425112	PAQR7	progestin and adipoQ receptor family member VII
27.8.13	0.000206921	7.00512e-06	5.57448	3.73561	0.459823	PCDH12	protocadherin 12
30.3.8	0.000124854	3.53102e-06	-5.83521	4.40443	-0.532474	PDCD4	programmed cell death 4
16.9.19	0.00048999	2.48312e-05	5.09673	2.50179	0.984177	PDLIM1	PDZ and LIM domain 1 (elfin)
46.17.3	6.7426e-07	1.71883e-09	-8.95502	11.8292	-0.980078	PDLIM4	PDZ and LIM domain 4
29.12.14	0.000145984	4.28067e-06	5.76175	4.21643	0.489715	PEX14	peroxisomal biogenesis factor 14
7.12.14	0.000394823	1.85318e-05	5.20687	2.78683	0.493526	PEX6	peroxisomal biogenesis factor 6
3.2.7	0.00020194	6.73134e-06	-5.58961	3.77452	-0.334562	PGK1	phosphoglycerate kinase 1
48.9.7	1.2351e-07	1.41522e-10	-10.1048	14.2287	-1.56	PHYH
37.3.12	0.000146719	4.32516e-06	-5.75781	4.20633	-0.766977	PLK2	polo-like kinase 2 (Drosophila)
34.1.6	0.000260301	9.96465e-06	-5.44101	3.39176	-0.378175	PLP1	proteolipid protein 1
31.16.19	6.28217e-05	1.32842e-06	-6.21091	5.35932	-0.558971	PLTP	phospholipid transfer protein
14.17.2	0.000468503	2.33445e-05	5.11996	2.56192	0.517693	PMPCB	peptidase (mitochondrial processing) beta
46.9.3	0.000193778	6.31795e-06	-5.61366	3.83638	-0.49564	PMS1	PMS1 postmeiotic segregation increased 1 (S. cerevisiae)
48.7.1	3.19983e-05	4.99974e-07	6.59174	6.3138	0.4946	PNRC1	proline-rich nuclear receptor coactivator 1
32.3.4	2.12329e-06	9.9529e-09	-8.1905	10.1291	-0.783515	POLE3	polymerase (DNA directed), epsilon 3 (p17 subunit)
37.17.7	0.0001065	2.81782e-06	-5.92151	4.62478	-0.509512	POLR2H	polymerase (RNA) II (DNA directed) polypeptide H
28.1.14	3.98684e-05	6.87315e-07	6.46707	6.00299	1.03886	PPA2	pyrophosphatase (inorganic) 2
6.8.10	1.94289e-05	2.46909e-07	6.87056	7.00262	0.71983	PRDX1	peroxiredoxin 1
41.9.10	0.000201342	6.67994e-06	-5.59251	3.78201	-0.609341	PSMD9	proteasome (prosome, macropain) 26S subunit, non-ATPase, 9
41.14.4	3.85907e-06	2.43202e-08	-7.81391	9.26111	-0.807181	PTBP2	polypyrimidine tract binding protein 2
41.6.1	1.63241e-05	1.90448e-07	-6.97407	7.256	-0.643514	PTCD3	Pentatricopeptide repeat domain 3
41.9.18	7.7683e-05	1.83688e-06	-6.08583	5.04274	-0.638736	PTP4A1	protein tyrosine phosphatase type IVA, member 1
19.16.13	0.000410543	1.94794e-05	5.18809	2.73824	0.591958	PXMP4	peroxisomal membrane protein 4, 24kDa
16.10.10	0.000369176	1.70359e-05	5.23858	2.86885	0.564546	QSOX1	quiescin Q6 sulfhydryl oxidase 1
42.14.5	0.000111592	3.02227e-06	-5.89469	4.55637	-0.473242	RAB33B	RAB33B, member RAS oncogene family
43.1.4	1.27814e-06	4.59331e-09	-8.52297	10.8787	-0.914335	RAB6A	RAB6A, member RAS oncogene family
42.5.19	0.000225609	8.04482e-06	-5.52202	3.60057	-0.349446	RACGAP1	Rac GTPase activating protein 1
29.2.13	0.000452616	2.22519e-05	5.138	2.60861	0.571212	RAD9A	RAD9 homolog A (S. pombe)
10.13.2	1.86908e-05	2.31054e-07	6.89697	7.0674	0.57149	RALGDS	ral guanine nucleotide dissociation stimulator
33.16.19	0.000307468	1.278e-05	-5.34699	3.14907	-0.527228	RAPSN	receptor-associated protein of the synapse
24.17.14	3.76634e-05	6.238e-07	6.50499	6.0977	0.794768	RBL1	retinoblastoma-like 1 (p107)
46.3.11	0.000394843	1.857e-05	5.2061	2.78483	0.343733	RCBTB1	regulator of chromosome condensation (RCC1) and BTB (POZ) domain containing protein 1
46.10.5	6.13265e-05	1.29059e-06	-6.22209	5.38754	-0.837618	RCJMB04_10e18	similar to Membrane-associated protein HEM-1 (Hematopoietic protein 1)
7.3.11	5.09768e-06	3.6204e-08	7.64868	8.87405	0.664403	RCJMB04_11o12	cysteine-rich PDZ-binding protein
45.10.5	2.81708e-07	5.28202e-10	-9.48855	12.9659	-1.23253	RCJMB04_13a9	DnaJ (Hsp40) homolog, subfamily B, member 12
41.10.19	2.41853e-05	3.40105e-07	-6.74358	6.69002	-0.74318	RCJMB04_13j13	ribosomal protein S3A
32.3.8	7.32878e-06	6.08141e-08	-7.43543	8.36903	-0.662818	RCJMB04_13m20	chromosome 6 open reading frame 32
45.9.1	7.25796e-05	1.65194e-06	-6.12673	5.1464	-0.634057	RCJMB04_14b4	pelota homolog (Drosophila)
7.9.1	0.000210776	7.20677e-06	5.56372	3.70792	0.759134	RCJMB04_14d15	similar to hypothetical protein FLJ34969
19.2.7	3.49905e-05	5.59483e-07	-6.54761	6.20397	-0.346333	RCJMB04_14f14	similar to Hypothetical protein KIAA0286 (HA6800)
45.4.18	0.000411524	1.95474e-05	5.18678	2.73485	0.405919	RCJMB04_14i9	proteasome (prosome, macropain) subunit, alpha type, 5
23.10.7	0.000221954	7.80306e-06	5.53358	3.63034	0.849682	RCJMB04_15d19	YTH domain family, member 1
41.17.9	6.48493e-05	1.4152e-06	-6.18644	5.2975	-0.592436	RCJMB04_16e1	sarcoglycan, beta (43kDa dystrophin-associated glycoprotein)
43.8.3	2.9161e-05	4.40453e-07	-6.64158	6.43758	-0.450412	RCJMB04_17b14	interferon regulatory factor 5
20.9.5	0.0003142	1.32097e-05	5.33451	3.11682	0.34995	RCJMB04_18e15	RB1-inducible coiled-coil 1
15.8.17	1.77896e-05	2.13104e-07	6.9292	7.14632	0.746781	RCJMB04_18g17	basic transcription factor 3-like 4
19.13.3	0.000121774	3.42125e-06	5.84727	4.43527	0.565276	RCJMB04_19j2	loss of heterozygosity, 12, chromosomal region 1
18.17.1	0.000285534	1.13916e-05	5.39043	3.26122	0.498472	RCJMB04_19j20	guanosine monophosphate reductase
46.19.10	0.000382132	1.78527e-05	5.22094	2.82321	0.342973	RCJMB04_1b8	CCAAT/enhancer binding protein zeta
48.10.4	0.000167454	5.17786e-06	-5.68929	4.03065	-0.680567	RCJMB04_1d1	insulin induced gene 1
48.16.5	6.33432e-05	1.35363e-06	6.20364	5.34095	0.493207	RCJMB04_1d3	septin 5
46.15.9	0.000303227	1.24608e-05	-5.35655	3.17374	-0.706372	RCJMB04_1f22	NECAP endocytosis associated 2
27.8.8	1.25259e-05	1.31783e-07	7.12174	7.61521	0.547289	RCJMB04_1f23	cathepsin S
48.15.3	0.000321909	1.39159e-05	-5.31486	3.06605	-0.726876	RCJMB04_1g4	FUS interacting protein (serine/arginine-rich) 1
14.15.1	1.01294e-06	3.27096e-09	8.67098	11.2073	0.990613	RCJMB04_1i23	prohibitin 2
12.2.13	0.000211384	7.30232e-06	5.55872	3.69506	0.663672	RCJMB04_1m21	serine/arginine repetitive matrix 1
14.19.2	0.000228239	8.23799e-06	5.51303	3.57741	0.448362	RCJMB04_1m6	KIAA1333 protein
43.13.13	5.43759e-05	1.09035e-06	-6.28742	5.55224	-0.414582	RCJMB04_1o7	peptidylprolyl isomerase F (cyclophilin F)
45.2.13	1.55351e-05	1.71534e-07	7.01591	7.35806	0.572322	RCJMB04_20k15	electron-transferring-flavoprotein dehydrogenase
48.15.9	0.000436603	2.12653e-05	-5.15507	2.65278	-0.910281	RCJMB04_20o23	REST corepressor 3
11.1.2	0.000204652	6.88982e-06	5.58078	3.75181	0.660969	RCJMB04_21i2	chromosome 11 open reading frame 2
37.3.10	5.03538e-07	1.15394e-09	-9.13331	12.2136	-0.95102	RCJMB04_22g22	non-POU domain containing, octamer-binding
15.9.9	4.43631e-05	8.17928e-07	6.39919	5.83306	0.891604	RCJMB04_24e12	enolase 1, (alpha)
14.9.8	0.000306953	1.27418e-05	-5.34813	3.15199	-0.331765	RCJMB04_25m16	tuftelin interacting protein 11
28.8.11	4.93186e-06	3.39065e-08	7.6758	8.93785	0.458639	RCJMB04_26d13	laminin, gamma 1 (formerly LAMB2)
19.17.8	0.000200318	6.63552e-06	5.59505	3.78852	0.594981	RCJMB04_26e18	heterogeneous nuclear ribonucleoprotein D (AU-rich element RNA binding protein 1, 37kDa)
15.1.18	1.97844e-06	8.7587e-09	8.24502	10.2531	1.08608	RCJMB04_29f20	outer mitochondrial membrane cytochrome b5
45.12.19	1.46478e-05	1.59447e-07	-7.04519	7.42934	-0.710169	RCJMB04_29j22	methylenetetrahydrofolate dehydrogenase (NADP+ dependent) 1, methenyltetrahydrofolate cyclohydrolase, formyltetrahydrofolate synthetase
34.17.3	0.000303227	1.24305e-05	-5.35746	3.17611	-0.623756	RCJMB04_29l1	DEAH (Asp-Glu-Ala-His) box polypeptide 30
18.16.7	1.0118e-06	3.21457e-09	8.67859	11.2241	0.819891	RCJMB04_2b17	jumonji domain containing 2B
19.13.2	0.000125382	3.5525e-06	5.83289	4.39851	1.51496	RCJMB04_2e20	protein phosphatase 1M (PP2C domain containing)
20.2.17	9.95802e-06	9.28378e-08	7.26322	7.95678	1.34864	RCJMB04_2k16	similar to RIKEN cDNA 2810405J04
46.3.10	2.53722e-07	4.49299e-10	-9.56304	13.1214	-0.926851	RCJMB04_30e3	death-associated protein
3.5.11	0.000249564	9.43664e-06	5.46161	3.44487	0.958837	RCJMB04_31i7	leucine rich repeat containing 45
41.7.4	6.74316e-06	5.24083e-08	-7.49635	8.51392	-0.750994	RCJMB04_32b21	STIP1 homology and U-box containing protein 1
46.7.4	9.11788e-06	8.45304e-08	-7.30125	8.04816	-0.666023	RCJMB04_32b21	STIP1 homology and U-box containing protein 1
46.5.19	3.19068e-05	4.96882e-07	-6.59418	6.31986	-0.644518	RCJMB04_32b21	STIP1 homology and U-box containing protein 1
27.17.9	0.000418262	1.99764e-05	5.17861	2.7137	0.338986	RCJMB04_32b21	STIP1 homology and U-box containing protein 1
15.15.3	0.000167454	5.18339e-06	5.68888	4.02961	0.416613	RCJMB04_32b21	STIP1 homology and U-box containing protein 1
23.5.10	0.00052083	2.71242e-05	5.06351	2.41579	0.417939	RCJMB04_32b21	STIP1 homology and U-box containing protein 1
41.4.1	0.000144978	4.23608e-06	5.76574	4.22665	0.422019	RCJMB04_32b21	STIP1 homology and U-box containing protein 1
4.17.4	0.000304803	1.25572e-05	5.35363	3.16622	0.551176	RCJMB04_32b21	STIP1 homology and U-box containing protein 1
36.3.6	2.05014e-06	9.2897e-09	-8.21989	10.196	-0.673271	RCJMB04_35e14	Src-like-adaptor
3.19.7	0.000102064	2.64728e-06	-5.94543	4.68576	-0.819725	RCJMB04_37h11	unc-93 homolog B1 (C. elegans)
14.8.14	0.000287673	1.15076e-05	5.3866	3.25135	0.856162	RCJMB04_37l21	holocytochrome c synthase (cytochrome c heme-lyase)
28.15.6	0.00030794	1.2879e-05	5.34408	3.14155	0.66168	RCJMB04_38n13	similar to chromosome 1 open reading frame 37
43.9.5	0.000149484	4.46116e-06	-5.74601	4.17611	-0.451629	RCJMB04_3a16	FXYD domain containing ion transport regulator 6
23.2.7	0.000234043	8.52127e-06	-5.50023	3.54442	-0.303119	RCJMB04_3c6	growth hormone inducible transmembrane protein
18.16.1	5.09768e-06	3.63741e-08	7.64674	8.86949	0.688309	RCJMB04_3e10	phosphatidylinositol glycan anchor biosynthesis, class K
41.16.1	0.000225521	8.02244e-06	-5.52308	3.60329	-0.431891	RCJMB04_3f15	sorcin
8.2.14	0.000151136	4.52577e-06	5.74053	4.16207	0.880482	RCJMB04_3f15	sorcin
39.1.10	4.06623e-05	7.09962e-07	-6.45441	5.97133	-0.489221	RCJMB04_3f23	zinc finger protein 313
43.15.7	6.3329e-05	1.34904e-06	-6.20495	5.34427	-0.828993	RCJMB04_3f8	dihydrolipoamide dehydrogenase
45.15.4	9.30412e-05	2.32118e-06	-5.99585	4.81416	-0.484901	RCJMB04_3i4	cytokine induced protein 29 kDa
41.15.3	0.000238134	8.73159e-06	-5.491	3.52063	-0.431171	RCJMB04_3j20	myeloid leukemia factor 2
36.17.7	0.000512247	2.64661e-05	5.07275	2.43971	0.631727	RCJMB04_3l19	WW domain containing E3 ubiquitin protein ligase 2
45.1.19	7.08467e-06	5.75629e-08	-7.45791	8.42255	-0.769812	RCJMB04_3p13	coatomer protein complex, subunit gamma
10.17.5	0.000230113	8.32786e-06	5.50892	3.56683	0.411641	RCJMB04_4a24	CTD (carboxy-terminal domain, RNA polymerase II, polypeptide A) small phosphatase like 2
46.2.3	7.10819e-05	1.60305e-06	-6.13832	5.17575	-0.444812	RCJMB04_4b12	ubiquitin-conjugating enzyme E2 variant 2
43.2.5	0.000468503	2.33519e-05	-5.11984	2.56161	-0.609275	RCJMB04_4e5	thioredoxin domain containing 9
4.12.19	0.000341787	1.5149e-05	-5.28283	2.98327	-0.602294	RCJMB04_4h24	ClpX caseinolytic peptidase X homolog (E. coli)
11.12.17	0.000267468	1.03963e-05	5.42498	3.3504	0.46764	RCJMB04_4i13	Sec31 homolog A (S. cerevisiae)
13.17.14	9.58619e-05	2.42599e-06	5.9789	4.77102	0.471369	RCJMB04_4o13	WD repeat domain 44
11.11.17	0.0003142	1.32505e-05	5.33335	3.11382	0.42258	RCJMB04_4p8	similar to cytochrome b-5 reductase
43.16.5	7.4633e-06	6.25829e-08	7.42371	8.3411	0.351302	RCJMB04_5g2	Ras-related GTP binding C
9.18.1	7.73793e-05	1.81761e-06	6.08989	5.05304	0.645341	RCJMB04_5i4	galactosidase, beta 1
19.9.15	9.51757e-05	2.39426e-06	5.98396	4.78388	0.630869	RCJMB04_5p23	CD36 molecule (thrombospondin receptor)
48.5.19	4.92875e-06	3.36284e-08	-7.67921	8.94587	-0.903105	RCJMB04_6c21	SLIT-ROBO Rho GTPase activating protein 3
11.9.2	0.000348523	1.57017e-05	5.26932	2.94834	0.481316	RCJMB04_6g16	microtubule-associated protein 1 light chain 3 beta
27.13.15	0.000280617	1.11224e-05	5.39946	3.28455	0.697623	RCJMB04_6i10	PC4 and SFRS1 interacting protein 1
14.3.13	2.36928e-05	3.30712e-07	6.75465	6.71737	1.42994	RCJMB04_6i5	DEAH (Asp-Glu-Ala-His) box polypeptide 38
23.1.18	0.000113974	3.11055e-06	5.88368	4.52825	0.744683	RCJMB04_6n13	guanine nucleotide binding protein (G protein), beta polypeptide 1
26.5.20	8.76516e-07	2.5565e-09	-8.77921	11.4456	-0.675071	RCJMB04_7b13	engulfment and cell motility 1
27.8.3	0.000197256	6.48273e-06	5.60389	3.81126	0.829877	RCJMB04_7g13	tripartite motif-containing 8
47.11.19	3.95577e-05	6.75777e-07	-6.47369	6.01953	-0.494163	RCJMB04_7o8	acireductone dioxygenase 1
15.5.18	1.00097e-05	9.59366e-08	7.24992	7.92477	0.74502	RCJMB04_8b16	LSM14A, SCD6 homolog A (S. cerevisiae)
36.3.4	6.99453e-06	5.57376e-08	-7.4711	8.45394	-0.781781	RCJMB04_8b8	cyclin K
41.4.4	0.000517695	2.68285e-05	-5.06764	2.42647	-0.545376	RCJMB04_9b2	similar to CDNA sequence BC024814
15.9.2	5.38383e-06	3.92571e-08	7.61523	8.79525	0.568568	RCJMB04_9e6	DnaJ (Hsp40) homolog, subfamily B, member 14
45.2.5	3.3591e-06	1.76702e-08	-7.94765	9.57163	-1.20192	RCJMB04_9l13	LanC lantibiotic synthetase component C-like 1 (bacterial)
15.15.19	5.69938e-05	1.16659e-06	6.26121	5.48622	0.575564	RCJMB04_9m9	SREBF chaperone
33.6.16	0.000420911	2.0142e-05	-5.1755	2.70565	-0.627341	RGS10	regulator of G-protein signaling 10
16.1.14	1.60294e-05	1.82308e-07	6.99153	7.29862	0.910941	RGS22	regulator of G-protein signaling 22
40.5.5	0.000244267	9.10912e-06	-5.47498	3.47934	-0.448014	RNF121	ring finger protein 121
20.14.5	4.22368e-05	7.52354e-07	6.43177	5.91468	0.443097	RNF128	ring finger protein 128
44.10.3	0.000321338	1.3841e-05	-5.3169	3.07131	-0.607606	RNF185	ring finger protein 185
12.3.18	0.000246894	9.24568e-06	5.46934	3.46482	0.654032	RNF41	ring finger protein 41
20.17.8	0.000218642	7.65247e-06	5.54097	3.64936	0.761984	RNGTT	RNA guanylyltransferase and 5'-phosphatase
41.12.19	0.000292994	1.18116e-05	5.37675	3.22591	0.417417	ROCK1	Rho-associated, coiled-coil containing protein kinase 1
19.1.9	0.000146719	4.31801e-06	5.75844	4.20795	0.383741	RPL8	ribosomal protein L8
37.1.9	5.92395e-06	4.50467e-08	-7.55853	8.66132	-0.780929	RPN1	ribophorin I
28.9.1	1.3747e-05	1.4821e-07	7.07451	7.50063	1.01592	RPS24	ribosomal protein S24
25.17.3	1.5931e-06	6.22303e-09	-8.39166	10.5845	-0.74001	RRAD	Ras-related associated with diabetes
45.5.4	0.000410111	1.94375e-05	5.1889	2.74034	0.435346	RRM2B	ribonucleotide reductase M2 B (TP53 inducible)
46.18.5	0.000501428	2.57243e-05	-5.08344	2.46739	-0.494673	RTEL1	regulator of telomere elongation helicase 1
10.16.3	2.72776e-05	3.96378e-07	6.68312	6.54053	0.535805	RW1	RW1 protein
41.19.11	8.41392e-05	2.03775e-06	-6.04589	4.94136	-0.562138	RXRG	retinoid X receptor, gamma
10.3.15	5.33812e-05	1.05372e-06	6.30068	5.58562	1.70714	SAP18	Sin3A-associated protein, 18kDa
45.9.18	1.61713e-07	1.93718e-10	-9.95583	13.9283	1.48	SCD
27.9.7	1.66796e-07	2.33732e-10	-9.86736	13.7485	1.15	scGH
32.10.4	3.05995e-05	4.73336e-07	6.61325	6.36727	1.00514	SCO1	SCO cytochrome oxidase deficient homolog 1 (yeast)
46.9.7	6.74316e-06	5.30322e-08	-7.49149	8.5024	-0.680094	SCP2	sterol carrier protein 2
16.3.7	0.000436603	2.12541e-05	5.15527	2.6533	0.705689	SCRN3	secernin 3
40.3.5	5.2742e-05	1.02889e-06	6.30994	5.60892	0.421252	SDHD	succinate dehydrogenase complex, subunit D, integral membrane protein
19.10.7	7.8842e-05	1.8725e-06	6.07844	5.02398	0.851909	SDHD	succinate dehydrogenase complex, subunit D, integral membrane protein
27.15.10	8.89715e-05	2.19185e-06	6.01787	4.87016	1.18666	SDK1	sidekick 1
44.5.6	2.99176e-06	1.54262e-08	-8.00481	9.70359	-0.614243	SEC14L1	SEC14-like 1 (S. cerevisiae)
32.16.5	2.18096e-05	2.96475e-07	-6.79793	6.82405	-0.790219	SERINC3	serine incorporator 3
43.16.3	5.2742e-05	1.02126e-06	-6.31282	5.61618	-0.479699	SETD8	SET domain containing (lysine methyltransferase) 8
15.11.12	1.58795e-05	1.77817e-07	7.00151	7.32296	1.16334	SGSM3	small G protein signaling modulator 3
10.14.7	4.18237e-05	7.36272e-07	6.4402	5.93579	1.29551	SH3BP4	SH3-domain binding protein 4
37.15.4	0.000456209	2.25966e-05	-5.13221	2.59363	-0.460465	SHMT1	serine hydroxymethyltransferase 1 (soluble)
43.12.8	1.10031e-05	1.10927e-07	-7.1912	7.78323	-0.614192	SIN3A	SIN3 homolog A, transcription regulator (yeast)
23.3.9	1.19568e-05	1.22682e-07	7.15056	7.68501	0.674065	SKAP2	src kinase associated phosphoprotein 2
45.2.1	0.000225609	8.0683e-06	-5.52092	3.59772	-0.744114	SLC25A22	solute carrier family 25 (mitochondrial carrier: glutamate), member 22
27.17.7	0.000452616	2.22752e-05	5.1376	2.60759	0.744152	SLC25A43	solute carrier family 25, member 43
44.7.19	1.66796e-07	2.37314e-10	-9.86021	13.7339	-2.23	SLC2A2
16.10.7	0.000171848	5.39709e-06	5.67352	3.99016	0.526066	SLC2A6	solute carrier family 2 (facilitated glucose transporter), member 6
3.8.7	0.000417578	1.99002e-05	-5.18004	2.71742	-0.29106	SLC33A1	solute carrier family 33 (acetyl-CoA transporter), member 1
45.9.7	7.06677e-06	5.66813e-08	-7.46422	8.43758	-0.745752	SLC37A3	solute carrier family 37 (glycerol-3-phosphate transporter), member 3
31.11.7	1.45589e-05	1.57721e-07	-7.04955	7.43996	-0.589108	SLC37A3	solute carrier family 37 (glycerol-3-phosphate transporter), member 3
23.2.8	9.89501e-05	2.55546e-06	5.95896	4.72024	0.815273	SLC9A3R1	solute carrier family 9 (sodium/hydrogen exchanger), member 3 regulator 1
33.1.6	8.86692e-06	8.1582e-08	-7.31567	8.08276	-0.708199	SLIT2	slit homolog 2 (Drosophila)
24.1.9	0.000233075	8.46111e-06	5.50291	3.55134	0.568901	SLTM	SAFB-like, transcription modulator
20.16.7	5.12335e-05	9.76638e-07	6.33018	5.65983	1.00583	SMAD6	SMAD family member 6
38.15.1	0.000299246	1.22152e-05	-5.36406	3.19314	-0.333775	SMO	smoothened homolog (Drosophila)
16.5.4	5.86967e-05	1.21297e-06	6.24611	5.44813	0.807155	SMO	smoothened homolog (Drosophila)
26.19.14	0.000337521	1.46962e-05	5.29428	3.01285	0.425333	SMYD3	SET and MYND domain containing 3
43.19.5	6.74316e-06	5.27467e-08	-7.49371	8.50766	-0.676945	SNX7	sorting nexin 7
48.8.18	1.66796e-07	2.39195e-10	-9.85651	13.7263	-1.85	SOD3
42.9.18	8.83798e-06	8.05545e-08	-7.32082	8.09511	-0.96621	SOLH	small optic lobes homolog (Drosophila)
39.8.5	8.90795e-05	2.19915e-06	-6.0166	4.86691	-0.635102	SORBS1	sorbin and SH3 domain containing 1
20.13.14	0.0003142	1.32771e-05	5.33259	3.11186	0.544203	SPP2	secreted phosphoprotein 2, 24kDa
27.17.1	3.59426e-05	5.78452e-07	6.53454	6.17141	0.615456	SPTAN1	spectrin, alpha, non-erythrocytic 1 (alpha-fodrin)
33.17.9	0.000373959	1.73735e-05	-5.23119	2.84973	-0.774357	SREBF1	sterol regulatory element binding transcription factor 1
45.12.4	1.66796e-07	2.40293e-10	-9.85435	13.7219	1.12	SREBF1
42.12.5	8.83834e-07	2.76198e-09	-8.74519	11.3709	-0.686077	SSTR2	somatostatin receptor 2
11.5.2	0.000248241	9.37367e-06	5.46414	3.45141	1.13532	ST6GAL1	ST6 beta-galactosamide alpha-2,6-sialyltranferase 1
13.19.14	3.677e-06	2.08886e-08	7.87747	9.409	0.675167	STARD3NL	STARD3 N-terminal like
28.9.5	0.00011439	3.13306e-06	5.88092	4.52121	0.455738	STK10	serine/threonine kinase 10
45.10.4	1.55931e-06	5.92861e-09	-8.41255	10.6315	-0.738893	STK11	serine/threonine kinase 11
11.3.2	5.52627e-05	1.12252e-06	6.27614	5.52383	1.5174	STK25	serine/threonine kinase 25 (STE20 homolog, yeast)
26.10.1	0.0003142	1.32881e-05	5.33228	3.11106	0.794786	STX16	syntaxin 16
1.17.2	0.000248175	9.35826e-06	5.51323	3.48135	0.694	STYX	serine/threonine/tyrosine interacting protein
42.11.10	7.36283e-05	1.68993e-06	-6.11796	5.12419	-0.510814	SULF2	sulfatase 2
1.1.6	5.36791e-05	1.0624e-06	-6.29749	5.57761	-0.672558	SULT4A1	sulfotransferase family 4A, member 1
28.17.5	0.000117097	3.24456e-06	5.86754	4.48706	0.521106	SUMF2	sulfatase modifying factor 2
24.6.4	0.000341115	1.51014e-05	5.28402	2.98634	0.472974	SUSD4	sushi domain containing 4
37.5.20	4.06623e-05	7.1159e-07	6.45351	5.96909	0.457967	SYT17	synaptotagmin XVII
19.2.8	0.000200318	6.63032e-06	-5.59534	3.78928	-0.31049	TAOK3	TAO kinase 3
39.9.19	0.00041728	1.98643e-05	-5.18072	2.71918	-0.333641	TAP2	transporter 2, ATP-binding cassette, sub-family B (MDR/TAP)
37.3.9	1.86908e-05	2.29201e-07	6.90018	7.07525	0.386303	TBC1D13	TBC1 domain family, member 13
39.12.19	0.000224734	7.93592e-06	-5.52719	3.61387	-0.457981	TBK1	TANK-binding kinase 1
23.17.14	4.13165e-05	7.25191e-07	6.44612	5.9506	0.56921	TBL1X	transducin (beta)-like 1X-linked
12.5.13	6.68834e-05	1.48658e-06	6.16743	5.24943	0.713301	TESC	tescalcin
39.14.5	8.24491e-05	1.98393e-06	-6.05619	4.96751	-0.563884	TGM2	transglutaminase 2 (C polypeptide, protein-glutamine-gamma-glutamyltransferase)
38.14.18	1.55544e-05	1.72556e-07	-7.01353	7.35226	-0.617523	TGOLN2	trans-golgi network protein 2
45.12.5	7.70261e-06	6.69966e-08	-7.39588	8.2747	-0.784822	THRSPA	thyroid hormone responsive spot 14 alpha
30.5.6	0.000387177	1.81288e-05	-5.21516	2.80826	-0.584068	THSD7B	thrombospondin, type I, domain containing 7B
27.16.12	0.000211384	7.31038e-06	-5.55831	3.69399	-0.490299	THYN1	thymocyte nuclear protein 1
12.7.12	5.2742e-05	1.03287e-06	6.30844	5.60515	0.965198	TKT	transketolase (Wernicke-Korsakoff syndrome)
44.8.19	4.22707e-05	7.59552e-07	-6.42806	5.90538	-0.758149	TLR3	toll-like receptor 3
26.16.9	1.65754e-05	1.9597e-07	6.96265	7.22811	1.34891	TMEM14A	transmembrane protein 14A
45.2.9	7.08467e-06	5.74403e-08	-7.45878	8.42463	-1.06711	TMEM41B	transmembrane protein 41B
15.16.7	1.77896e-05	2.12642e-07	6.93006	7.14844	0.632139	TNNC1	troponin C type 1 (slow)
48.14.5	0.000277975	1.09887e-05	5.40403	3.29634	0.41606	TOM1L2	target of myb1-like 2 (chicken)
23.16.10	0.000433368	2.09687e-05	5.16035	2.66647	0.620982	TOMM34	translocase of outer mitochondrial membrane 34
44.5.19	1.66796e-07	2.43244e-10	-9.84862	13.7102	-1.29	TP53
37.3.8	2.36928e-05	3.30518e-07	6.75489	6.71794	0.630974	TRAF7	TNF receptor-associated factor 7
44.16.19	2.79948e-05	4.17006e-07	-6.66312	6.49099	-1.03063	TRAPPC2	trafficking protein particle complex 2
19.17.16	0.000145801	4.26772e-06	5.7629	4.21939	0.615149	TRDN	triadin
46.7.10	8.86692e-06	8.1742e-08	-7.31488	8.08085	-0.823477	TRIAP1	TP53 regulated inhibitor of apoptosis 1
20.1.2	0.000210776	7.22088e-06	5.56298	3.70601	0.558907	TSC22D1	TSC22 domain family, member 1
47.15.18	3.04619e-05	4.68116e-07	-6.61761	6.37809	-0.719512	TTC4	tetratricopeptide repeat domain 4
27.12.1	1.30275e-05	1.3854e-07	7.10162	7.56645	0.643461	TXNDC13	thioredoxin domain containing 13
37.3.6	2.76221e-05	4.07139e-07	-6.67256	6.51437	-0.747878	UBE2D2	ubiquitin-conjugating enzyme E2D 2 (UBC4/5 homolog, yeast)
44.15.19	4.4805e-05	8.34739e-07	-6.39126	5.81318	-0.944104	UBP1	upstream binding protein 1 (LBP-1a)
45.8.18	1.61133e-05	1.85471e-07	-6.98465	7.28184	-0.694286	UBQLN1	ubiquilin 1
37.20.5	1.68806e-07	2.57712e-10	-9.82152	13.6549	-1.34	UCP3
20.18.7	0.000371312	1.71925e-05	5.23513	2.85994	0.543952	UHRF1	ubiquitin-like, containing PHD and RING finger domains, 1
41.4.5	4.29303e-05	7.78112e-07	-6.41864	5.8818	-0.785743	UNC93A	unc-93 homolog A (C. elegans)
45.8.13	0.000211679	7.36466e-06	5.5555	3.68677	0.294108	USP10	ubiquitin specific peptidase 10
32.15.10	1.63241e-05	1.8996e-07	6.97509	7.25851	0.772558	USP47	ubiquitin specific peptidase 47
37.17.3	0.000135605	3.91278e-06	5.79602	4.30418	0.506716	USP7	ubiquitin specific peptidase 7
37.12.16	0.000267378	1.03748e-05	-5.42576	3.35241	-0.436345	VIL2	villin 2 (ezrin)
22.7.11	3.70029e-05	6.03225e-07	6.51812	6.13046	0.934615	VKORC1	vitamin K epoxide reductase complex, subunit 1
34.3.4	0.000117189	3.25321e-06	-5.86653	4.48446	-0.789301	VPS33A	vacuolar protein sorting 33 homolog A (S. cerevisiae)
41.17.7	1.83635e-06	7.93841e-09	-8.28708	10.3485	-1.11249	VPS72	vacuolar protein sorting 72 homolog (S. cerevisiae)
33.14.3	0.000433939	2.10222e-05	-5.15939	2.66398	-0.692968	VRK3	vaccinia related kinase 3
24.6.17	1.24014e-05	1.29828e-07	7.12776	7.62979	0.627049	WASF1	WAS protein family, member 1
37.1.1	0.000263296	1.01204e-05	5.43515	3.37663	0.424772	WDR73	WD repeat domain 73
44.6.5	0.000498524	2.54714e-05	-5.08716	2.47701	-0.51444	WPKCI-8	Wpkci
10.19.2	0.000432547	2.09064e-05	5.16147	2.66936	0.674282	WWC3	WWC family member 3
28.5.12	6.44703e-05	1.39699e-06	6.19145	5.31015	0.9378	XYLT2	xylosyltransferase II
15.8.8	0.000146994	4.34857e-06	5.75575	4.20106	0.599232	YWHAH	tyrosine 3-monooxygenase/tryptophan 5-monooxygenase activation protein, eta polypeptide
42.12.16	0.000104327	2.73315e-06	-5.93319	4.65458	-0.521358	ZAK	sterile alpha motif and leucine zipper containing kinase AZK
16.13.10	3.89625e-05	6.6358e-07	6.48081	6.03732	0.765392	ZBTB8OS	zinc finger and BTB domain containing 8 opposite strand
2.15.17	2.03439e-05	2.65954e-07	6.84103	6.9301	1.0338	ZC3H6	zinc finger CCCH-type containing 6
20.7.18	7.77435e-05	1.84236e-06	6.08468	5.03983	0.48548	ZEB1	zinc finger E-box binding homeobox 1
47.18.18	5.2742e-05	1.03217e-06	-6.3087	5.6058	-0.598076	ZNF512B	zinc finger protein 512B
38.3.10	1.73721e-06	7.41931e-09	-8.31607	10.414	-0.672853	ZNF536	zinc finger protein 536
45.9.20	1.23014e-05	1.27498e-07	7.13505	7.64745	0.548477	ZW10	ZW10, kinetochore associated, homolog (Drosophila)
2.12.14	1.53935e-05	1.68366e-07	7.02337	7.37624	1.32827	ZWILCH	Zwilch, kinetochore associated, homolog (Drosophila)
40.6.9	0.000110357	2.96009e-06	5.90265	4.57667	0.311774	ZXDC	ZXD family zinc finger C
16.9.3	0.000209631	7.15146e-06	5.56664	3.71544	0.719277	ZXDC	ZXD family zinc finger C
>
